# Supplementary material for: Educational and Relational Stressors Associated with Burnout in Korean Medical Students
Source: PubMed Central journal article supplement — Psychiatry Investig. 2015 Sep 30;12(4):451–8. doi: 10.4306/pi.2015.12.4.451 (PMC4620301; doi:10.4306/pi.2015.12.4.451), 2015-09-30
Supplement: pi-12-451-s001.pdf [file pi-12-451-s001.pdf]

**Supplementary Table 1. Educational stressors and relational stressors**

---

Educational stressors

- Feeling burdened with absolute amount of study
- Being worried about incompleteness of program (drop-out)
- Being worried about failure of this semester
- Being disturbed by frequency of examinations
- Being worried about academic performance
- Satisfied with present academic performance (inversely coded)
- Being stressed out from competing with peers
- Feeling lack in time for recreation/entertainment
- Adjusting self-directed learning and studying (inversely coded)
- Feeling too vast of academic curriculum
- Feeling dissatisfied with lectures

Relational stressors

- Good with faculty (inversely coded)
  - Good with peers or classmates (inversely coded)
  - Good with seniors or juniors of different years (inversely coded)
  - Experiencing bullying or alienation by peers
  - Feeling discriminated or unfairly treated by faculty
-
